# Supplementary material for: Forebrain nuclei linked to woodpecker territorial drum displays mirror those that enable vocal learning in songbirds
Source: PLoS Biol. 2022 Sep 20;20(9):e3001751. doi: 10.1371/journal.pbio.3001751 (PMC9488818; doi:10.1371/journal.pbio.3001751)
Supplement: S1 Data — (CSV) [file pbio.3001751.s011.csv]

Animal ID	dA PV cells per um	AI PV cells per um	dAN PV cells per um	AN cells per um
DW05	0.000377281	0.00012	0.000285354	5.31717E-05
DW15	0.000447044	0.000204	0.000541198	3.35536E-05
DW19	0.000318623	0.0001	0.000294512	4.57916E-05
DW17-01	0.000283285	0.000076	0.000286855	6.48702E-05
DW17-02	0.000476625	0.000136	0.000468754	0.000172093
DW17-03	0.000432285	0.00018	0.000569128	0.000106133
DW17-04	0.000352314	0.000056	0.000180553	2.2305E-05
DW18-01	0.000163114	0.000024	0.000421309	6.4988E-05
DW18-02	0.000218514	0.000028	0.000263686	1.84996E-05
DW18-03	0.00011732	0.00002	0.000496409	4.07624E-05
DW18-04	0.000174828	0.000044	0.000365024	3.92519E-05
DW18-05	0.000207145	0.000096	0.000485904	2.46298E-05
DW18-06	0.00011961	0.000052	0.000349811	7.2147E-05
DW18-07	0.000268305	0.000088	0.000323082	3.39051E-05
DW18-08	0.000342332	0.000072	0.000293541	4.18918E-05
DW18-09	0.000558055	0.000156	0.000114	1.21446E-05
ZF1	0.008097552	0.002647059	0.000775318	0.000117863
ZF2	0.011904488	0.001086607	0.000533305	9.14738E-05
